# Supplementary material
Source: PubMed Central journal article supplement (PMC3406118)

TABLE S1. Oligonucleotide primers used in this study

| Primer      | Target gene or plasmid                   | Sequence (5' - 3') <sup>a</sup>                      | Cohesive end |
|-------------|------------------------------------------|------------------------------------------------------|--------------|
| HisF        | pNVHis18                                 | GCTTTGGCGGTAGATCCCCT                                 |              |
| HisR        | pNVHis18, His-tag                        | TTACGAATTCTAGTGGTGGTGGTGGTGGT<br>GAGCTCGGTACCCGGGGAT | EcoRI        |
| TacF        | <i>tac</i> promoter                      | AAGCAAGCTTCTTATCGACTGCACGGTG                         | HindIII      |
| TacR        | <i>tac</i> promoter                      | CGCGCTGCAGCATATGATATCTCCT                            | PstI         |
| RHA1-xylB1F | <i>xylB1</i> from <i>R. jostii</i> RHA1  | CGATGAATTCTGATCACCGACAAGGCAC                         | EcoRI        |
| RHA1-xylB1R | <i>xylB1</i> from <i>R. jostii</i> RHA1  | ACTAAAGCTTACGCCGCCTTCGACTACA                         | HindIII      |
| RHA1-xylB2F | <i>xylB2</i> from <i>R. jostii</i> RHA1  | ATGCGAATTCTTCTATCAGCCGACGGTC                         | EcoRI        |
| RHA1-xylB2R | <i>xylB2</i> from <i>R. jostii</i> RHA1  | CTAAAAGCTTCGGTCGATGTCGGTGTCA                         | HindIII      |
| XylA1       | <i>xylA</i> from <i>S. lividans</i> TK23 | ACGACTGCAGATGAACTACCAGCCCA                           | PstI         |
| XylA2       | <i>xylA</i> from <i>S. lividans</i> TK23 | TAATGGTACCAGCGGGCGCCGAGGAG                           | KpnI         |
| xylB1       | <i>xylB</i> from <i>S. lividans</i> TK23 | ATTACTGCAGATGTCAGCAGCCGAGGG                          | PstI         |
| xylB2       | <i>xylB</i> from <i>S. lividans</i> TK23 | AATTGGTACCAGCGGGAGGCCGCGTCC                          | KpnI         |
| xyl-tac1    | Expression cassette of <i>xylB</i>       | GGGTTTTCCCAGTCACGACGTTGTA                            |              |
| xyl-tac2    | Expression cassette of <i>xylB</i>       | CTCGAAGCTTCGGCTCGTATGTTGTGT                          | HindIII      |

<sup>a</sup> The generated restriction sites used in the cloning procedure are underlined.

Figure S1. Map of plasmid pXYLAB. The plasmid contained both *xyIA* and *xyIB*, which expression was controlled by the *tac* promoter individually. The *repA* and *repB* encoded the region and proteins related to DNA replication in *Rhodococcus* strains. Other abbreviations of the plasmid as shown: kan, kanamycin resistance; neo, neomycin resistance phenotype; ori, origin of replication and P, promoter.

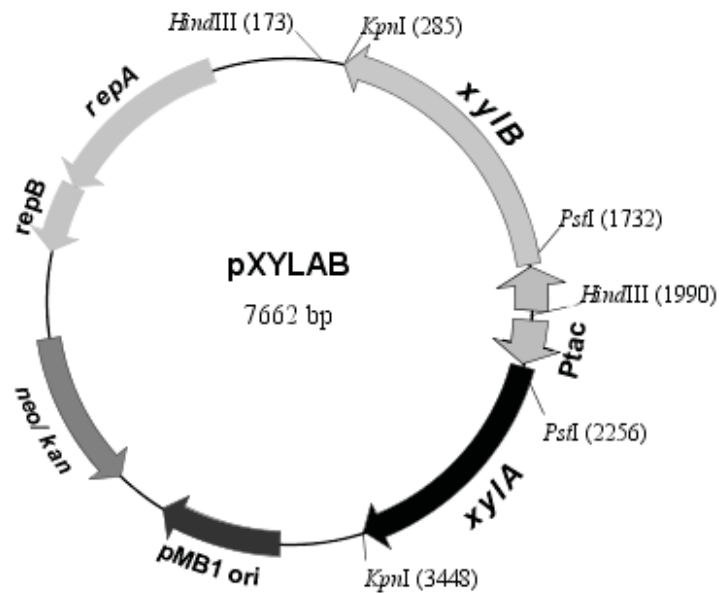

Supplement: AEM.08022-11_zam999103496so1.pdf [file AEM.08022-11_zam999103496so1.pdf]
